# Supplementary material
Source: bioRxiv or medRxiv preprint supplement (https://www.biorxiv.org/highwire/filestream/8513/field_highwire_adjunct_files/0/031781-1.pdf)
Supplement: Supplementary file [file 031781-1.pdf]

# Hybrid dysgenesis in *Drosophila simulans* due to a rapid global invasion of the *P*-element

Tom Hill<sup>1</sup>, Christian Schlötterer<sup>1</sup>, Andrea J. Betancourt<sup>1\*</sup>

|                                                                            |           |
|----------------------------------------------------------------------------|-----------|
| <b>Supplementary Materials and Methods</b>                                 | <b>2</b>  |
| 1. Fly strains                                                             | 2         |
| 2. Hybrid dysgenesis assays                                                | 2         |
| 3. Sterility assays                                                        | 3         |
| 4. Analysis of RNAseq data                                                 | 3         |
| 5. Analysis of whole genome sequence data                                  | 3         |
| 6. PCR                                                                     | 4         |
| 7. RT-PCR                                                                  | 4         |
| 8. Supplementary References                                                | 5         |
| <b>Supplementary Figures</b>                                               | <b>6</b>  |
| <b>Figure S1.</b> Hybrid dysgenic crosses and controls                     | 6         |
| <b>Figure S2.</b> Map of cytotypes                                         | 8         |
| <b>Figure S3.</b> Sterility assay results                                  | 9         |
| <b>Figure S4.</b> TE coverage comparison between DI & DS type lines        | 10        |
| <b>Figure S5.</b> Association between dysgenesis and P-element copy number | 11        |
| <b>Figure S6.</b> RT-PCR results                                           | 12        |
| <b>Supplementary Tables</b>                                                | <b>13</b> |
| <b>Table S1.</b> Strains used                                              | 13        |
| <b>Table S2.</b> Association between TE presence and cytotype              | 16        |
| <b>Table S3.</b> Primer sequences                                          | 19        |

## **Text S1. Supplementary Materials and Methods**

### **1. Fly strains.**

We used *D. simulans* isofemale lines collected across multiple locations over 15 years (see Supplementary Table 1 for details). The species identity of all lines was confirmed either by visual inspection of male genitalia or, when this was not possible, by amplification of PCR products that yield species-specific product lengths (using primer sequences for Argonaute2 (FBgn0087035), kindly provided by Darren Obbard: Mel\_Sim\_F 5'-CCCTAAACCGCAAGGATGGAG-3', D\_sim\_303\_R 5'-GTCCACTTGTGCGCCACATT-3', D\_mel\_394\_R 5'-CCTTGCCTTGGGATATTATTAGGTT-3'). Flies were reared on molasses-yeast-agar *Drosophila* medium. To obtain sufficient offspring from crosses that normally show high levels of cytoplasmic incompatibility, we cured lines of *Wolbachia* by raising larvae on food supplemented with 0.05mg/ml tetracycline-hydrochloride for 2 generations before performing crosses. After curing, flies were test for *Wolbachia* using PCR, with primer sequences wsp81F (5'-TGGTCCAATAAGTGATGAAGAAAC-3') and wsp691R (5'-AAAAATTAAACGCTACTCCA-3'), and a cycling program of 94°C for 5 minutes followed by 30 cycles of 94°C 30 seconds, 55°C for 1 minute and 72°C for 2 minutes, followed by 72°C for 10 minutes (1). If known, the infection status of lines prior to curing is given in Supplementary Table 1. Crosses performed using the same lines, but with and without cured flies had similar results (shown in Figure S1).

### **2. Hybrid dysgenesis assays.**

To assay for hybrid dysgenesis, we performed reciprocal crosses between lines, using 5 virgin males and females from each line. Flies were left to lay eggs for a total of 9 days at 29°C, transferred to a fresh vial every 3 days, and offspring reared at 29°C (28°C is the lowest temperature at which dysgenesis is observed in *D. melanogaster* (2)). We dissected 30 F1 females from each cross, and assessed them for the presence or absence of two normal ovaries. We scored the number of females lacking one or both ovaries as dysgenic, following (3). We used Fisher's exact tests to test for a difference between reciprocal crosses in the

number of dysgenic female offspring, allowing us to roughly categorize the strains as DI (dysgenesis inducing, having an excess of dysgenic offspring when crossed to susceptible females), DS (dysgenesis susceptible, having an excess of dysgenic offspring when crossed to inducing males), or DR (dysgenesis resistant, no excess in either direction). Some heterogeneity occurred within strains; and some strains could not be unambiguously classified (4 borderline DI/DR types, and 2 borderline DR/DS types, and 3 that tested as DI and DS ). These strains were not used in the analysis; in all, 177 strains were unambiguously cytotyped.

### **3. Sterility Assays.**

To assay for sterility, reciprocal crosses were performed as described previously at 29°C, newly emerged offspring from these crosses were collected as virgins as separated based on the date of collection. Following this, crosses between individual females and control virgin males (raised at 25°C) were established at 25°C in the following subsets: Dysgenic females aged 3-9 days, non-dysgenic females aged 3-9 days, Dysgenic Females aged 10-16 days, non-dysgenic females aged 10-16 days. Flies were left to mate and lay eggs for a total of 7 days and offspring from these crosses were collected every 2 days following this. We scored crosses by the number of offspring produced. We used a Wilcoxon Rank Sum Test to assess for a significant difference in the number of offspring for each direction ( $p < 0.05$ ).

### **4. Analysis of RNAseq data.**

Paired end Illumina reads (accession number PRJEB7936 (4)) were mapped to a *D. simulans* reference genome produced from a Madagascar strain (5) and 179 *Drosophila* transposable element (TE) sequences (<http://flybase.org/>; (6,7)) using GSNAP (parameters: -n =1, -N = 1)(8).

### **5. Analysis of whole genome sequence data.**

We used paired-end Illumina reads (SRA PRJEB7936; (4)) collected from 13 barcoded individual F1 offspring of the M252 reference strain females crossed to males from Florida (2010) isofemale lines, and the paired end reads from the M252 reference strain (5). We mapped these data to the *D. simulans* M252 reference genome using BWA-SW (default parameters) (9–11) and following the mapping protocol described in Kofler et al (2012). The average coverage per sequenced F1 cross was 36.36. We counted the number of insertions per

individual sequenced in two ways: First, we used PoPoolationTE [11] to identify and count TE insertions from different families, with the requirement that each insertion be supported by at least 3 reads. Insertions were considered to be potentially specific to the Florida lines if they occurred at count frequencies of 15-85% (as we expect insertions to be heterozygous) and were not present in the M252 sequence. Second, due to the fragmented nature of the *D. simulans* genome sequence, some insertion sites may be difficult to locate. We therefore also estimated TE copy number per family *via* average coverage of the TE sequence compared to average coverage of chromosome arm 2L.

## **6. PCR.**

Primers for TEs were designed based on the EMBL sequences (Supplementary Table 6, <http://flybase.org/>; (6,7)). The following PCR program was used: 94°C for 5 minutes followed by 30 cycles of 94°C 30 seconds, 55°C for 1 minute and 72°C for 1-3 minutes (depending on the expected length of the PCR product, 1 minute per kilobase); 72°C for 10 minutes. PCR products were run on a 1% agarose gel to test for the presence or absence of a TE. To survey for the P-element, primers were designed for each exon of P-element, shown in the following table. The presence of full P-elements was assessed using the forward primer for exon 0 and the reverse primer for exon 3 and using the TIR primer. Known P-types from *D. melanogaster* lines were used as positive controls in all PCRs. When possible, PCR results were confirmed with independent DNA extractions (though this was not possible for wild collected flies from Portugal and African samples from Michel Veuille, Supplementary Table S1). DNA quality was checked with a positive control PCR for an essential gene.

Sanger sequencing of a subset of PCR products was used to confirm that the amplicons correspond to P-element sequence; the sequence of additional sequencing primers is available upon request.

## **RT-PCR.**

RNA was isolated from Florida, Georgia, Harvard, Maryland and Madagascar lines using Peqlab TriFast RNA isolation protocol, and extractions checked on a 1% agarose gel. Following this, RT-PCR was performed using QIAGEN OneStep RT-PCR Kit. To assess the presence or absence of full P-element RNA, the following PCR program was used: 45°C for 30 minutes for reverse transcription.

95C for 15 minutes followed by 30 cycles of 94C for 15 seconds, 55C for 1 minute and 68C for 6 minutes; 68C for 10 minutes. We used the forward primer for exon 0 and the reverse primer for exon 3 to test for the presence of full expressed P-elements.

## 8. Supplementary References

1. Braig HR, Zhou W, Dobson SL, Neill SLO. Cloning and Characterization of a Gene Encoding the Major Surface Protein of the Bacterial Endosymbiont *Wolbachia pipientis*. J Bacteriol. 1998;180(9):2373–8.
2. Kidwell JF, Kidwell MG, Sved JA. Hybrid dysgenesis in *Drosophila melanogaster*: A syndrome of aberrant traits including mutation, sterility, and male recombination. Genetics. 1977;86:813–33.
3. Engels WR, Preston CR. Hybrid Dysgenesis in *Drosophila melanogaster*: The Biology of Female and Male Sterility. Genetics. 1979;92(2257):161–74.
4. Kofler R, Hill T, Nolte V, Betancourt AJ, Schlötterer C. The recent invasion of natural *Drosophila simulans* populations by the P-element. Proc Natl Acad Sci. 2015;112(21):6659–63.
5. Palmieri N, Nolte V, Chen J, Schlötterer C. Genome assembly and annotation of a *Drosophila simulans* strain from Madagascar. Mol Ecol Resour. 2014;
6. Quesneville H, Bergman CM, Andrieu O, Autard D, Nouaud D, Ashburner M, et al. Combined Evidence Annotation of Transposable Elements in Genome Sequences. PLoS Comput Biol. 2005;1(2):0166–75.
7. Kaminker JS, Bergman CM, Kronmiller B, Carlson J, Svirskas R, Patel S, et al. The Transposable Elements of the *Drosophila melanogaster* euchromatin: a genomics perspective. Genome Biol. 2002;3:RESEARCH0084.
8. Wu TD, Nacu S. Fast and SNP-tolerant detection of complex variants and splicing in short reads. Bioinforma Oxf Engl. 2010 Apr 1;26(7):873–81.
9. Li H, Durbin R. Fast and accurate short read alignment with Burrows-Wheeler transform. Bioinforma Oxf Engl. 2009;25(14):1754–60.
10. Li H, Handsaker B, Wysoker A, Fennell T, Ruan J, Homer N, et al. The Sequence Alignment/Map format and SAMtools. Bioinforma Oxf Engl. 2009;25(16):2078–9.
11. Kofler R, Betancourt AJ, Schlötterer C. Sequencing of pooled DNA Samples ( Pool-Seq ) uncovers complex dynamics of transposable element insertions in *Drosophila melanogaster*. PloS Genet. 2012;8(1):1–16.

Supplementary Figures

Figure S1

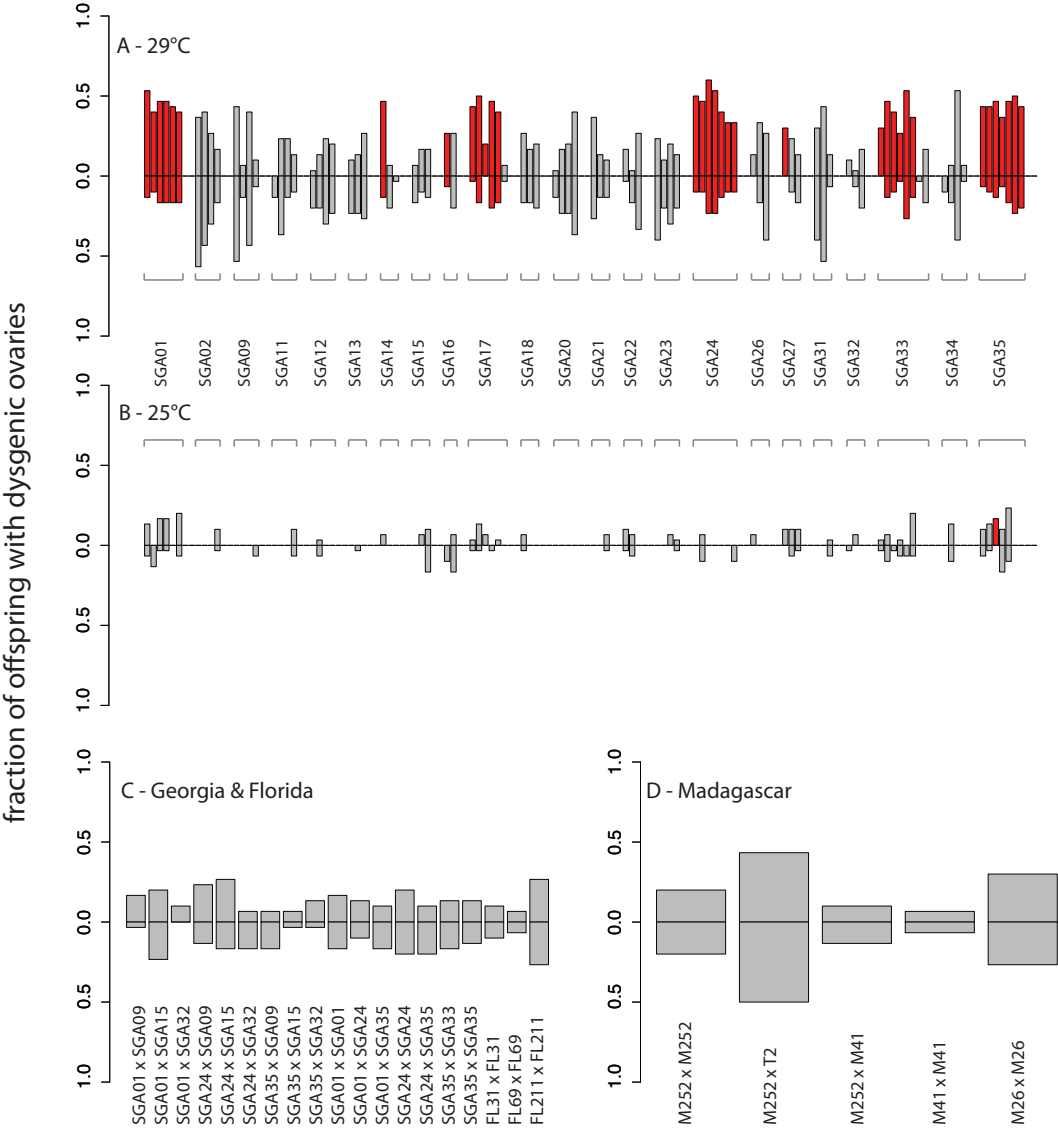

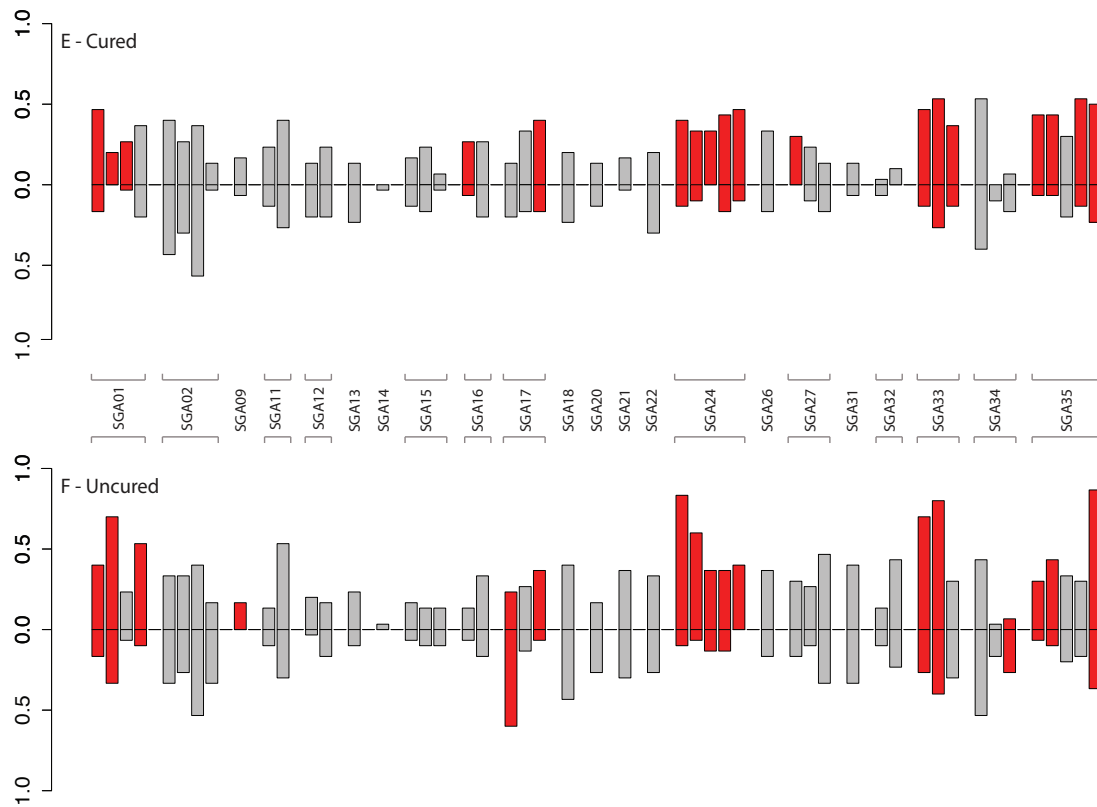

Figure S1. Hybrid dysgenic crosses and controls. Bar plots show the fraction of dysgenic offspring for both directions of each set of reciprocal crosses. Bars are coloured red when a significant difference between each reciprocal cross is found (Fisher's Exact Test,  $p < 0.05$ ). **A.** Initial crosses between Georgia (2009) and Madagascar (2004) flies at 29° C, with the fraction of dysgenic F1 females shown when the Georgia strain is paternal (positive direction) or maternal (negative direction). **B.** A subset of the crosses in panel A were repeated at 25° C, a non-dysgenic temperature in *D. melanogaster*; repeated crosses are shown in the same position as in panel A. **C.** Fraction of dysgenic offspring from crosses within and between Georgia and Florida lines at 29° C. The first strain named in the cross is the paternal strain in the positive direction and the maternal strain in the negative direction. **D.** Fraction of dysgenic offspring from crosses within and between Madagascar lines at 29° C. The first strain named in the cross is the paternal strain in the positive direction and the maternal strain in the negative direction. **E.** Fraction of dysgenic offspring from crosses between Georgia and Madagascar lines at 29C after curing of wolbachia with tetracycline hydrachloride for 2 generations. **F.** Fraction of dysgenic offspring from crosses between Georgia and Madagascar lines at 29C before curing.



**Figure S2**

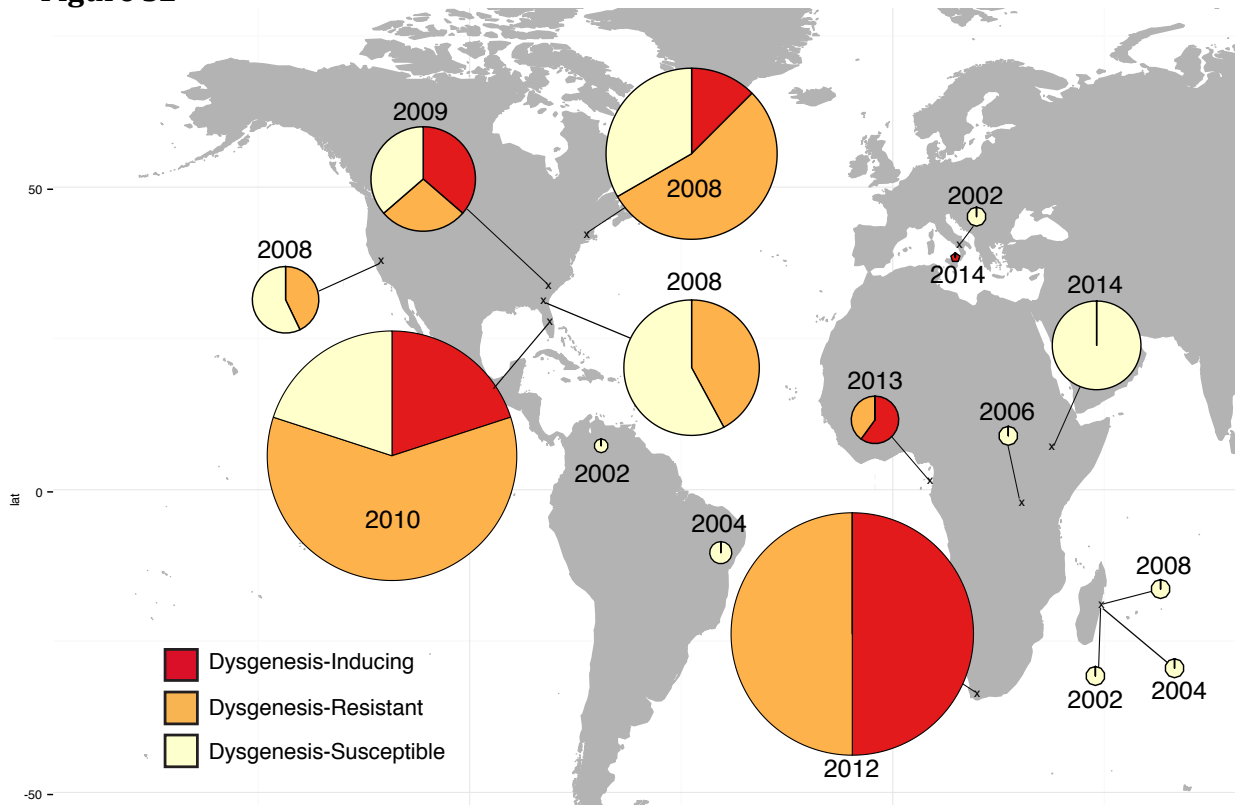

Figure S2. Map shows the approximate location where strains were collected; pie charts show the proportion of each population which were dysgenesis-inducing (red), dysgenesis-resistant (orange) and dysgenesis-susceptible (yellow). This summarizes the data given in Table 2. The area of the pie chart is proportional to the number of strains sampled.

**Figure S3**

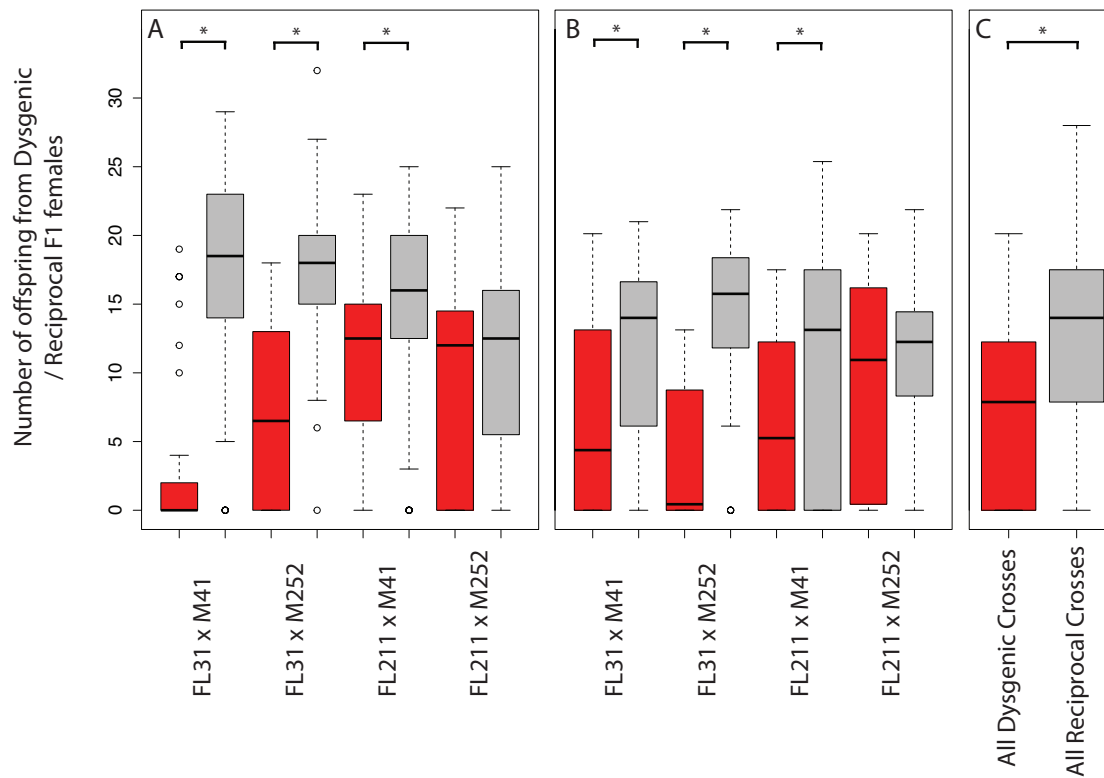

Figure S3. Plots showing the number of offspring produced by the female offspring from both the dysgenic (red) and reciprocal (grey) cross. Female parents were dissected after crossing to confirm the presence of gonadal dysgenesis (mean of 50.6% of female parents were dysgenic, compared to a mean of 8.6% dysgenic female parents in the reciprocal cross). **A.** Females were mated after 3-9 days of aging. **B.** Females were mated after 10-16 days of aging. **C.** Combined results for all crosses and ages. Crosses that show a significant difference in the number of offspring for each direction are marked with a star (Wilcoxon Rank Sum Test  $p < 0.05$ ).

**Figure S4**

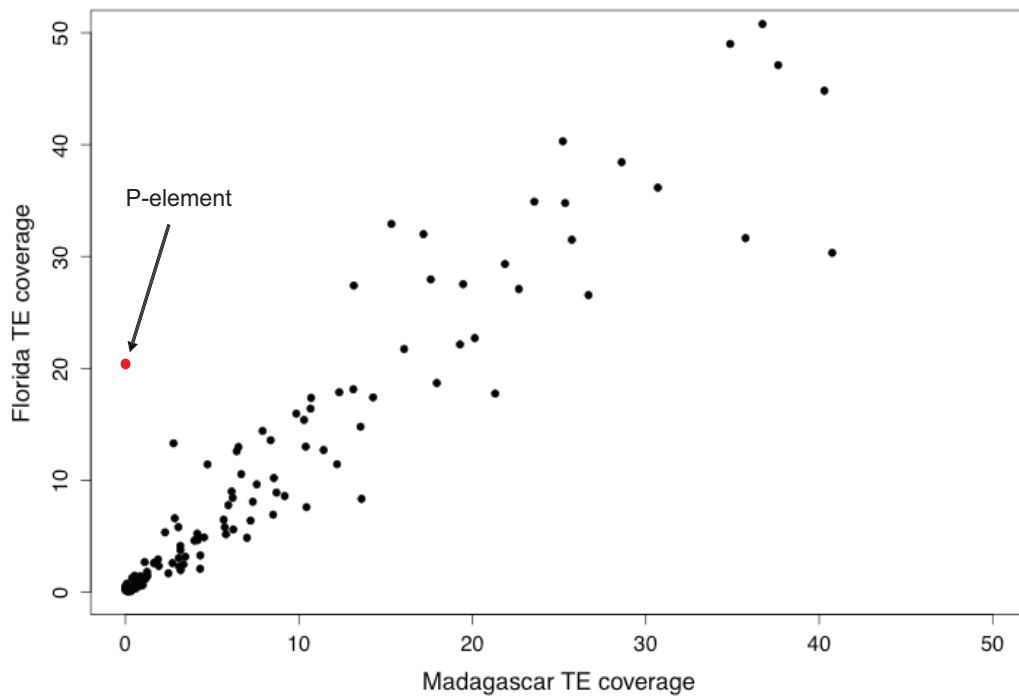

**Figure S4.** Average coverage for TEs in the sequenced Florida (2010) x Madagascar (2004) isofemale lines vs. coverage for TEs in M252 (2004). This Florida sequence data (SRA:PRJEB7936) and Madagascar data (SRA:SRX504933) was mapped to the *D. simulans* reference genome alongside Flybase TE sequences to identify differences in coverage for these TEs. Only one TE was found in Florida but not in Madagascar, P-element.

**Figure S5**

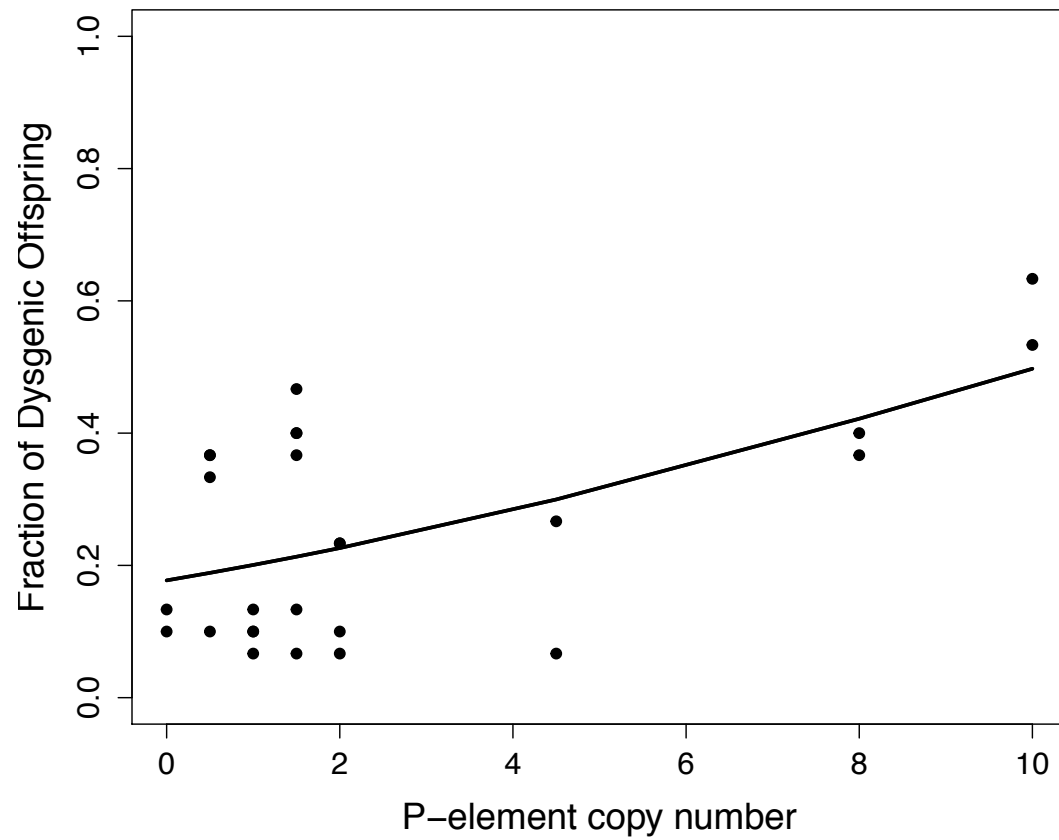

Figure S5. Estimated copy number of P-elements (estimated via dividing the average coverage of P-element in a sample by the average coverage of chromosome 2R) vs. the fraction of dysgenic offspring observed in a dysgenic cross. Line shows the fit of a binomial generalised linear model (Supplementary Table 2; z value = 5.87,  $p = 4.25 \times 10^{-9}$ ).

**Figure S6**

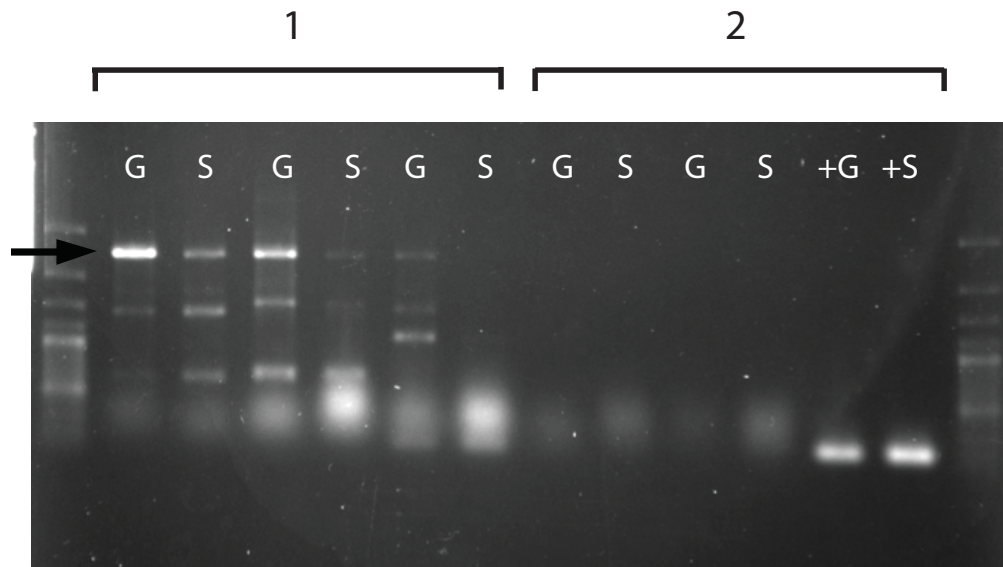

Figure S6. RT-PCR product from DI and DS lines. Group 1 consists of female flies from three DI lines roughly dissected into soma (S) and ovaries (G). The top band, at 2.6kb, corresponds to the expected size of the full-length P-element transcript after splicing. Group 2 consists of female flies from two DS lines with a positive control (*D. melanogaster* Harwich strain).

**Supplementary Table 1.** Fly strains used in this study, including time and date of collection, and collector. The fraction of strains with P-element are shown for each strain.

| population | n  | species            | Locality                             | year | collected by        | Lines                                                                                                                                                                              | proportion of strains with P-element exon |        |        |        | Number of strains with P-element |         |      |       |
|------------|----|--------------------|--------------------------------------|------|---------------------|------------------------------------------------------------------------------------------------------------------------------------------------------------------------------------|-------------------------------------------|--------|--------|--------|----------------------------------|---------|------|-------|
|            |    |                    |                                      |      |                     |                                                                                                                                                                                    | exon 0                                    | exon 1 | exon 2 | exon 3 | full                             | partial | none | total |
| SGA        | 22 | <i>D. simulans</i> | Athens, Georgia, USA                 | 2009 | P.Haddrill          | SGA1-2, 9, 11-18, 20-22, 24, 26-27, 31-35                                                                                                                                          | 0.68                                      | 0.5    | 0.45   | 1      | 7                                | 15      | 0    | 22    |
| ANDA       | 7  | <i>D. simulans</i> | Andasibe, Madagascar                 | 2008 | J.R. David          | A1, 3-6, 9, 11                                                                                                                                                                     | 0.56                                      | 0.84   | 0.14   | 0.28   | 0                                | 6       | 1    | 7     |
| M          | 5  | <i>D. simulans</i> | unknown, Madagascar                  | 2004 | B. Ballard          | M4, 26, 41, 252, 258                                                                                                                                                               | 0                                         | 0      | 0      | 0      | 0                                | 0       | 5    | 5     |
| Mad        | 1  | <i>D. simulans</i> | unknown, Madagascar                  | 2009 | E. Helmich          | M5                                                                                                                                                                                 | 1                                         | 0      | 0      | 0      | 0                                | 1       | 0    | 1     |
| TANA       | 7  | <i>D. simulans</i> | Antananarivo, Madagascar             | 2008 | J.R. David          | T1-2, 6-10                                                                                                                                                                         | 0.42                                      | 0.42   | 0.14   | 0.71   | 0                                | 5       | 2    | 7     |
| FL         | 36 | <i>D. simulans</i> | Tampa, Florida, USA                  | 2010 | R. Tobler           | FL3, 6, 11, 15, 26-27, 30-31, 35, 69, 82, 96-98, 101, 108, 113, 116, 131, 136, 141, 150, 155, 164-165, 168, 174, 183-184, 187, 189, 198, 200, 203, 208, 211                        | 0.81                                      | 0.56   | 0.56   | 0.81   | 17                               | 12      | 7    | 36    |
| SA         | 34 | <i>D. simulans</i> | Kanonkop, South Africa               | 2013 | H. van Schalkwyk    | SA1104-1105, 1109, 1112, 1116, 1118, 1120, 1123-1125, 1128-1129, 1134, 1140, 1144, 1146, 1148, 1157, 1161-1163, 1165, 1175-1176, 1183-1184, 1187-1189, 1191-1192, 1195, 1197, 1198 | 1                                         | 1      | 1      | 1      | 34                               | 0       | 0    | 34    |
| HAR        | 14 | <i>D. simulans</i> | Harvard, Massachusetts, USA          | 2008 | A. Paaby            | HAR1-3, 5-8, 10, 13-14, 16-17, 20, 21                                                                                                                                              | 0.28                                      | 0      | 0      | 0.14   | 0                                | 4       | 10   | 14    |
| DAV        | 19 | <i>D. simulans</i> | Davis, California, USA               | 2009 | M. Turelli          | DAV1-8, 11, 13, 15-16, 18-20, 23, 26, 28                                                                                                                                           | 0.05                                      | 0.05   | 0      | 0      | 0                                | 1       | 18   | 19    |
| MED        | 17 | <i>D. simulans</i> | Media, Pennsylvania, USA             | 2008 | A. Paaby            | MED1, 3-14, 16-17, 19, 20                                                                                                                                                          | 0.12                                      | 0.059  | 0      | 0      | 0                                | 2       | 15   | 17    |
| CHU        | 13 | <i>D. simulans</i> | Churchville, Maryland, USA           | 2008 | A. Paaby            | CHU2, 4-6, 10-12, 15, 17-19, 21, 22                                                                                                                                                | 0.69                                      | 0.31   | 0.23   | 0.69   | 5                                | 4       | 4    | 13    |
| HIN        | 19 | <i>D. simulans</i> | South Carolina, USA                  | 2008 | A. Paaby            | HIN1-18, 20                                                                                                                                                                        | 0.053                                     | 0.053  | 0.053  | 0.053  | 0                                | 1       | 18   | 19    |
| IRF        | 13 | <i>D. simulans</i> | Jasper, Florida, USA                 | 2008 | A. Paaby            | IRF1, 3-4, 6-8, 10-14, 17, 18                                                                                                                                                      | 0.077                                     | 0.077  | 0.077  | 0      | 0                                | 2       | 11   | 13    |
| LPS        | 10 | <i>D. simulans</i> | Morven, Georgia, USA                 | 2008 | A. Paaby            | LPS1-6, 9, 12-14                                                                                                                                                                   | 0                                         | 0      | 0      | 0      | 0                                | 0       | 10   | 10    |
| PD         | 12 | <i>D. simulans</i> | Padova, Italy                        | 2002 | E. Tauber           | PD7-8, 18-19, 29, 38, 42-43, 52-53, 55, 67                                                                                                                                         | 0                                         | 0      | 0      | 0      | 0                                | 0       | 12   | 12    |
| BGT        | 2  | <i>D. simulans</i> | Guaymaral, close to Boqota, Columbia | 2002 | P. Orozco-terWengel | BGT4, 6                                                                                                                                                                            | 0                                         | 0      | 0      | 0      | 0                                | 0       | 2    | 2     |
| TU         | 1  | <i>D. simulans</i> | Djerba, Tunisia                      | 2001 | M. Puchinger        | TU46                                                                                                                                                                               | 0                                         | 0      | 0      | 0      | 0                                | 0       | 1    | 1     |
| ZOM        | 2  | <i>D. simulans</i> | Zomba, Malawi                        | 2001 | C. Niessinger       | ZOM3, 4                                                                                                                                                                            | 0                                         | 0      | 0      | 0      | 0                                | 0       | 2    | 2     |
| KIB        | 2  | <i>D. simulans</i> | Kibale, Uganda                       | 2001 | M. Imhof            | KIB11, 73                                                                                                                                                                          | 0                                         | 0      | 0      | 0      | 0                                | 0       | 2    | 2     |
| ABU        | 9  | <i>D. simulans</i> | Ubatuba, Brazil                      | 2004 | J. F. Garcia        | ABU4, 7, 16, 18, 23-26, 28                                                                                                                                                         | 0                                         | 0      | 0      | 0      | 0                                | 0       | 9    | 9     |
| Mandra     | 6  | <i>D. simulans</i> | Mandraka Park, Madagascar            | 2008 | J.R. David          | MAND2-5, 7, 9                                                                                                                                                                      | 0.67                                      | 0.67   | 0      | 0.5    | 0                                | 4       | 2    | 6     |

| population | n  | species            | Locality                        | year | collected by    | Lines                                                                                                                          | proportion of strains with P-element exon |        |        |        | Number of strains with P-element |         |      |       |
|------------|----|--------------------|---------------------------------|------|-----------------|--------------------------------------------------------------------------------------------------------------------------------|-------------------------------------------|--------|--------|--------|----------------------------------|---------|------|-------|
|            |    |                    |                                 |      |                 |                                                                                                                                | exon 0                                    | exon 1 | exon 2 | exon 3 | full                             | partial | none | total |
| YA         | 3  | <i>D. simulans</i> | Nairobi, Kenya                  | 2013 | D.Matute        | YA9, 19, 29                                                                                                                    | 0.33                                      | 0.33   | 0      | 0.33   | 0                                | 3       | 0    | 3     |
| ST         | 7  | <i>D. simulans</i> | Sao Tome, Sao Tome and Principe | 2013 | D.Matute        | ST1,ST14,ST16,ST5,ST6,ST8                                                                                                      | 1                                         | 1      | 1      | 1      | 7                                | 0       | 0    | 7     |
| BS         | 5  | <i>D. simulans</i> | Antananarivo, Madagascar        | 2013 | D.Matute        | BS0, 4, 8                                                                                                                      | 1                                         | 1      | 1      | 1      | 5                                | 0       | 0    | 5     |
| BIO        | 15 | <i>D. simulans</i> | Bioko Norte, Equatorial Guinea  | 2013 | D.Matute        | BIOKO B11,BIOKO C1.3,BIOKO C1.5,BIOKO C4,BIOKO F5,BIOKO FH7,BIOKO L9,BIOKO LOZ,BIOKO LP88,BIOKO MC,BIOKO R2,BIOKO RIM,BIOKO SJ | 1                                         | 1      | 1      | 1      | 15                               | 0       | 0    | 15    |
| SREN       | 3  | <i>D. simulans</i> | Sorrento, Italy                 | 2014 | M.Pegoraro      | SREN17, 52, 61                                                                                                                 | 1                                         | 0.33   | 0.33   | 0.66   | 1                                | 2       | 0    | 3     |
| MD         | 16 | <i>D. simulans</i> | Antananarivo, Madagascar        | 2002 | B. Ballard      | MD6, 13, 15, 42, 63, 71, 73, 75, 105-106, 199, 221, 223, 233, 242, 251                                                         | 0                                         | 0      | 0      | 0      | 0                                | 0       | 16   | 16    |
| NS         | 12 | <i>D. simulans</i> | Nairobi, Kenya                  | 2006 | B. Ballard      | NS5, 31-33, 39-40, 50, 71, 78-79, 113, 137                                                                                     | 0                                         | 0      | 0      | 0      | 0                                | 0       | 12   | 12    |
| PORT       | 60 | <i>D. simulans</i> | North Portugal, Portugal        | 2006 | E.Sucena        | DNA from 60 wild-caught flies                                                                                                  | 0.13                                      | 0.18   | 0.16   | 0.18   | 3                                | 10      | 47   | 60    |
| POR        | 36 | <i>D. simulans</i> | North Portugal, Portugal        | 2013 | E.Sucena        | DNA from 36 wild-caught flies                                                                                                  | 1                                         | 1      | 1      | 1      | 36                               | 0       | 0    | 36    |
| IT         | 38 | <i>D. simulans</i> | Bologna, Italy                  | 2014 | M.F.Shou        | IT1-38                                                                                                                         | 1                                         | 1      | 1      | 1      | 38                               | 0       | 0    | 38    |
| CRO        | 50 | <i>D. simulans</i> | Zabqreb, Croatia                | 2014 | A.M. Jaksic     | CRO1-50                                                                                                                        | 1                                         | 1      | 1      | 1      | 50                               | 0       | 0    | 50    |
| ED         | 1  | <i>D. simulans</i> | Dodola, Ethiopia                | 2008 | J.Pool          | ED7                                                                                                                            | 1                                         | 0      | 0      | 1      | 0                                | 1       | 0    | 1     |
| KN         | 1  | <i>D. simulans</i> | Nyahururu, Kenya                | 2009 | J.Pool          | KN86                                                                                                                           | 1                                         | 0      | 0      | 1      | 0                                | 1       | 0    | 1     |
| UK         | 1  | <i>D. simulans</i> | Kisoro, Uganda                  | 2012 | R.Corbett       | UK6                                                                                                                            | 1                                         | 0      | 0      | 1      | 0                                | 1       | 0    | 1     |
| UB         | 1  | <i>D. simulans</i> | Bundibugyo, Uganda              | 2012 | R.Corbett       | UB5                                                                                                                            | 1                                         | 0      | 0      | 1      | 0                                | 1       | 0    | 1     |
| TZ         | 1  | <i>D. simulans</i> | Uyole, Tanzania                 | 2009 | L.Nsemwa        | TZ5                                                                                                                            | 0                                         | 0      | 0      | 0      | 0                                | 0       | 1    | 1     |
| KR         | 1  | <i>D. simulans</i> | Mariqat, Kenya                  | 2009 | J.Pool          | KR56                                                                                                                           | 0                                         | 0      | 0      | 0      | 0                                | 0       | 1    | 1     |
| EZ         | 1  | <i>D. simulans</i> | Ziway, Ethiopia                 | 2008 | J.Pool          | EZ108                                                                                                                          | 0                                         | 0      | 0      | 0      | 0                                | 0       | 1    | 1     |
| SP         | 1  | <i>D. simulans</i> | Phalaborwa, South Africa        | 2010 | J.Pool          | SP1                                                                                                                            | 1                                         | 1      | 1      | 1      | 1                                | 0       | 0    | 1     |
| KT         | 1  | <i>D. simulans</i> | Thika, Kenya                    | 2009 | J.Pool          | KT24                                                                                                                           | 1                                         | 0      | 0      | 1      | 0                                | 1       | 0    | 1     |
| BA         | 4  | <i>D. simulans</i> | Puglia, Italy                   | 2014 | O.Rota-Stabelli | Bari1-4                                                                                                                        | 1                                         | 1      | 1      | 1      | 4                                | 0       | 0    | 4     |
| RIV        | 2  | <i>D. simulans</i> | Riverside,California, USA       | 1988 | M.Turelli       | Riv84, 88                                                                                                                      | 0                                         | 0      | 0      | 0      | 0                                | 0       | 2    | 2     |
| YOL        | 2  | <i>D. simulans</i> | Yolo,California, USA            | 2010 | M.Turelli       | yolo0, 10                                                                                                                      | 0                                         | 0.5    | 0      | 0      | 0                                | 1       | 1    | 2     |
| IRV        | 1  | <i>D. simulans</i> | Irvine,California, USA          | 2014 | M.Turelli       | Irv14                                                                                                                          | 1                                         | 1      | 1      | 1      | 2                                | 0       | 0    | 2     |
| Mex1       | 1  | <i>D. simulans</i> | Oaxaca, Mexico                  | 2002 | S.Castrezana    | 14021-0251.180                                                                                                                 | 0                                         | 0      | 0      | 0      | 0                                | 0       | 1    | 1     |
| Mex2       | 1  | <i>D. simulans</i> | Sonora, Mexico                  | 2009 | T.Markow        | 14021-0251.270                                                                                                                 | 0                                         | 0      | 0      | 0      | 0                                | 0       | 1    | 1     |
| Mex3       | 1  | <i>D. simulans</i> | Guanajuato, Mexico              | 2014 | T.Markow        | 14021-0251.312                                                                                                                 | 1                                         | 1      | 1      | 1      | 1                                | 0       | 0    | 1     |
| Mex4       | 1  | <i>D. simulans</i> | Cusco, Peru                     | 2009 | D.Lindsley      | 14021-0251.279                                                                                                                 | 0                                         | 1      | 0      | 0      | 0                                | 1       | 0    | 1     |
| CAM1       | 10 | <i>D. simulans</i> | Nyasoso, Cameroon               | 2004 | M. Vieulle      | CAM1.1-1.10                                                                                                                    | 0                                         | 0      | 0      | 0      | 0                                | 0       | 10   | 10    |
| CAM2       | 25 | <i>D. simulans</i> | Nyasoso, Cameroon               | 2007 | M. Vieulle      | CAM2.1-2.25                                                                                                                    | 0                                         | 0      | 0      | 0      | 0                                | 0       | 25   | 25    |
| CAM3       | 18 | <i>D. simulans</i> | Nyasoso, Cameroon               | 2010 | M. Vieulle      | CAM3.1-3.18                                                                                                                    | 0                                         | 0      | 0      | 0      | 0                                | 0       | 18   | 18    |
| TANZ       | 41 | <i>D. simulans</i> | Liqnees, Tanzania               | 1996 | M. Vieulle      | TANZ1-41                                                                                                                       | 0                                         | 0      | 0      | 0      | 0                                | 0       | 41   | 41    |
| ZIMB       | 6  | <i>D. simulans</i> | Nyanqa, Zimbabwe                | 1997 | M. Vieulle      | ZIMB1-6                                                                                                                        | 0                                         | 0      | 0      | 0      | 0                                | 0       | 6    | 6     |
| AA         | 11 | <i>D. simulans</i> | Addis Ababa, Ethiopia           | 2014 | W.Miller        | AA1-14                                                                                                                         | 0                                         | 0      | 0      | 0      | 0                                | 0       | 12   | 12    |

| population | n  | species             | Locality                 | year | collected by | Lines                                   | proportion of strains with P-element exon |        |        |        | Number of strains with P-element |         |      |       |
|------------|----|---------------------|--------------------------|------|--------------|-----------------------------------------|-------------------------------------------|--------|--------|--------|----------------------------------|---------|------|-------|
|            |    |                     |                          |      |              |                                         | exon 0                                    | exon 1 | exon 2 | exon 3 | full                             | partial | none | total |
| LD         | 10 | <i>D. sechellia</i> | La Digue, The Seychelles | 2014 | D.Matute     | LD8, 10, 12-13, 16-20, 118              | 0                                         | 0      | 0      | 0      | 0                                | 0       | 10   | 10    |
| DNF        | 11 | <i>D. sechellia</i> | Denis, The Seychelles    | 2014 | D.Matute     | DNF3-4, 10, 12, 20, 29, 47, 51, 66, 118 | 0                                         | 0      | 0      | 0      | 0                                | 0       | 11   | 11    |
| ANRO       | 9  | <i>D. sechellia</i> | Mahé, The Seychelles     | 2014 | D.Matute     | ANRO1, 5-7, 16, 26, 102, 110, 219       | 0                                         | 0      | 0      | 0      | 0                                | 0       | 9    | 9     |



**Supplementary Table 2.** Association between cytotypes of *D. simulans* strains and infection status for individual TE families. Note that individual exons for the P-element could be amplified from all 51 DS strains; the results shown here are for amplification of the full P-element.

| FlyBase<br>Accession | TE Identity      | NCBI<br>Accession | No. of Reads<br>Mapping to TE | DI strain type |          | DS strain type |           | Dysgenic Cross |                 | Non-Dysgenic Cross |                |
|----------------------|------------------|-------------------|-------------------------------|----------------|----------|----------------|-----------|----------------|-----------------|--------------------|----------------|
|                      |                  |                   |                               | present        | absent   | present        | absent    | Z value        | p-value         | Z value            | p-value        |
| FBgn0000004          | 17.6             | X01472            | 2                             | 51             | 0        | 41             | 0         | -0.39149       | 0.730           | -1.18624           | 0.80632        |
| FBgn0000005          | 297              | X03431            | 130                           | 51             | 0        | 41             | 0         | -2.01491       | 0.893           | -1.42197           | 0.81195        |
| FBgn0000007          | 1731             | X07656            | 1430                          | 51             | 0        | 41             | 0         | -1.67161       | 0.921           | 0.24463            | 0.58643        |
| FBgn0000155          | roo              | AY180917          | 2046                          | 51             | 0        | 41             | 0         | -3.30206       | 0.267           | -1.66303           | 0.47847        |
| FBgn0000199          | blood            | AY180916          | 690                           | 51             | 0        | 41             | 0         | -0.99903       | 0.944           | -1.5414            | 0.70209        |
| FBgn0000349          | copia            | X02599            | 162                           | 51             | 0        | 41             | 0         | -1.87497       | 0.678           | -1.14494           | 0.56334        |
| FBgn0000481          | Doc              | X17551            | 668                           | 51             | 0        | 41             | 0         | -1.06952       | 0.451           | -0.33114           | 0.96105        |
| FBgn0000638          | FB               | V00246            | 62                            | 51             | 0        | 41             | 0         | -2.74924       | 0.379           | -0.9269            | 0.64241        |
| FBgn0000652          | F-element        | AC005198          | 66                            | 51             | 0        | 41             | 0         | -1.7608        | 0.844           | -1.18336           | 0.90021        |
| FBgn0001100          | G-element        | X06950            | 2                             | 51             | 0        | 41             | 0         | 0.46267        | 0.149           | -0.55518           | 0.75958        |
| FBgn0001167          | gypsy            | M12927            | 82                            | 51             | 0        | 41             | 0         | -3.00189       | 0.415           | -1.14864           | 0.70764        |
| FBgn0001181          | HB               | X01748            | 36                            | 51             | 0        | 41             | 0         | -2.37633       | 0.759           | -1.31492           | 0.85416        |
| FBgn0001207          | HMS-Beagle       | AF365402          | 222                           | 51             | 0        | 41             | 0         | -2.23781       | 0.801           | -0.66547           | 0.62644        |
| FBgn0001210          | hobo             | M69216            | 1070                          | 51             | 0        | 41             | 0         | -2.22755       | 0.820           | -0.75427           | 0.97104        |
| FBgn0001249          | I-element        | M14954            | 234                           | 51             | 0        | 41             | 0         | -2.48112       | 0.916           | -1.05276           | 0.94185        |
| FBgn0001283          | jockey           | M22874            | 56                            | 51             | 0        | 41             | 0         | -1.97423       | 0.692           | -0.72319           | 0.75113        |
| FBgn0002651          | Dmau\mariner     | M14653            | 356                           | 51             | 0        | 41             | 0         | -2.32102       | 0.728           | -1.04207           | 0.9305         |
| FBgn0002697          | mdg1             | X59545            | 108                           | 51             | 0        | 41             | 0         | -0.5451        | 0.342           | 0.23008            | 0.61598        |
| FBgn0002698          | mdg3             | X95908            | 116                           | 51             | 0        | 41             | 0         | -2.46209       | 0.363           | -1.48184           | 0.71795        |
| FBgn0002745          | micropia         | X14037            | 40                            | 51             | 0        | 41             | 0         | -2.45071       | 0.870           | -0.97708           | 0.44451        |
| FBgn0003007          | opus             | AY180918          | 1226                          | 51             | 0        | 41             | 0         | -1.86519       | 0.891           | -1.8927            | 0.784          |
| <b>FBgn0003055</b>   | <b>P-element</b> | <b>X06779</b>     | <b>1220</b>                   | <b>45</b>      | <b>6</b> | <b>0</b>       | <b>41</b> | <b>5.87411</b> | <b>4.25E-09</b> | <b>0.372</b>       | <b>0.17028</b> |
| FBgn0003519          | Stalker          | AF420242          | 18                            | 51             | 0        | 41             | 0         | -2.45438       | 0.598           | -1.59377           | 0.5864         |
| FBgn0003908          | R1A1-element     | X51968            | 208                           | 51             | 0        | 41             | 0         | -0.36968       | 0.617           | -1.06801           | 0.82507        |
| FBgn0003909          | R2-element       | X51967            | 120                           | 51             | 0        | 41             | 0         | -0.81102       | 0.714           | -1.18112           | 0.94652        |
| FBgn0004082          | Tirant           | X93507            | 0                             | 51             | 0        | 41             | 0         | -1.40231       | 0.719           | -1.46964           | 0.82176        |
| FBgn0004141          | HeT-A            | U06920            | 4                             | 51             | 0        | 41             | 0         | -0.28359       | 0.041           | -0.38739           | 0.84494        |
| FBgn0004904          | TART-A           | AY561850          | 8684                          | 51             | 0        | 41             | 0         | 0.03328        | 0.417           | -0.84346           | 0.8967         |
| FBgn0004904          | TART-B           | U14101            | 2996                          | 51             | 0        | 41             | 0         | -1.09765       | 0.868           | -0.85201           | 0.96626        |
| FBgn0005384          | 3S18             | U23420            | 124                           | 51             | 0        | 41             | 0         | -1.50212       | 0.746           | -1.02926           | 0.72679        |
| FBgn0005673          | 1360             | AC005453          | 1873                          | 51             | 0        | 41             | 0         | -1.70071       | 0.937           | -0.6999            | 0.81417        |
| FBgn0005773          | Bari1            | X67681            | 786                           | 51             | 0        | 41             | 0         | -2.4699        | 0.271           | -1.25788           | 0.68563        |
| FBgn0010103          | aurora-element   | AB022762          | 68                            | 51             | 0        | 41             | 0         | -1.12437       | 0.838           | -0.48058           | 0.80053        |
| FBgn0010302          | Burdock          | U89994            | 808                           | 51             | 0        | 41             | 0         | -3.13347       | 0.679           | -0.80122           | 0.95492        |
| FBgn0013017          | Dtei\I-element   | M28878            | 2                             | 51             | 0        | 41             | 0         | -1.21917       | 0.874           | -0.8261            | 0.95352        |

| FlyBase<br>Accession | TE Identity  | NCBI<br>Accession | No. of Reads<br>Mapping to TE | DI strain type |          | DS strain type |           | Dysgenic Cross |              | Non-Dysgenic Cross |                |
|----------------------|--------------|-------------------|-------------------------------|----------------|----------|----------------|-----------|----------------|--------------|--------------------|----------------|
|                      |              |                   |                               | present        | absent   | present        | absent    | Z value        | p-value      | Z value            | p-value        |
| FBgn0000004          | 17.6         | X01472            | 2                             | 51             | 0        | 41             | 0         | -0.39149       | 0.730        | -1.18624           | 0.80632        |
| FBgn0000005          | 297          | X03431            | 130                           | 51             | 0        | 41             | 0         | -2.01491       | 0.893        | -1.42197           | 0.81195        |
| FBgn0000007          | 1731         | X07656            | 1430                          | 51             | 0        | 41             | 0         | -1.67161       | 0.921        | 0.24463            | 0.58643        |
| FBgn0000155          | roo          | AY180917          | 2046                          | 51             | 0        | 41             | 0         | -3.30206       | 0.267        | -1.66303           | 0.47847        |
| FBgn0000199          | blood        | AY180916          | 690                           | 51             | 0        | 41             | 0         | -0.99903       | 0.944        | -1.5414            | 0.70209        |
| FBgn0000349          | copia        | X02599            | 162                           | 51             | 0        | 41             | 0         | -1.87497       | 0.678        | -1.14494           | 0.56334        |
| FBgn0000481          | Doc          | X17551            | 668                           | 51             | 0        | 41             | 0         | -1.06952       | 0.451        | -0.33114           | 0.96105        |
| FBgn0000638          | FB           | V00246            | 62                            | 51             | 0        | 41             | 0         | -2.74924       | 0.379        | -0.9269            | 0.64241        |
| FBgn0000652          | F-element    | AC005198          | 66                            | 51             | 0        | 41             | 0         | -1.7608        | 0.844        | -1.18336           | 0.90021        |
| FBgn0001100          | G-element    | X06950            | 2                             | 51             | 0        | 41             | 0         | 0.46267        | 0.149        | -0.55518           | 0.75958        |
| FBgn0001167          | gypsy        | M12927            | 82                            | 51             | 0        | 41             | 0         | -3.00189       | 0.415        | -1.14864           | 0.70764        |
| FBgn0001181          | HB           | X01748            | 36                            | 51             | 0        | 41             | 0         | -2.37633       | 0.759        | -1.31492           | 0.85416        |
| FBgn0001207          | HMS-Beagle   | AF365402          | 222                           | 51             | 0        | 41             | 0         | -2.23781       | 0.801        | -0.66547           | 0.62644        |
| FBgn0001210          | hobo         | M69216            | 1070                          | 51             | 0        | 41             | 0         | -2.22755       | 0.820        | -0.75427           | 0.97104        |
| FBgn0001249          | I-element    | M14954            | 234                           | 51             | 0        | 41             | 0         | -2.48112       | 0.916        | -1.05276           | 0.94185        |
| FBgn0001283          | jockey       | M22874            | 56                            | 51             | 0        | 41             | 0         | -1.97423       | 0.692        | -0.72319           | 0.75113        |
| FBgn0002651          | Dmau\mariner | M14653            | 356                           | 51             | 0        | 41             | 0         | -2.32102       | 0.728        | -1.04207           | 0.9305         |
| FBgn0002697          | mdg1         | X59545            | 108                           | 51             | 0        | 41             | 0         | -0.5451        | 0.342        | 0.23008            | 0.61598        |
| FBgn0002698          | mdg3         | X95908            | 116                           | 51             | 0        | 41             | 0         | -2.46209       | 0.363        | -1.48184           | 0.71795        |
| FBgn0013099          | Dvir\Tv1     | AF056940          | 1                             | 51             | 0        | 41             | 0         | -1.33233       | 0.710        | -0.89187           | 0.89622        |
| FBgn0014947          | flea         | Z27119            | 390                           | 51             | 0        | 41             | 0         | -0.69113       | 0.887        | -1.4806            | 0.4231         |
| FBgn0014967          | hopper       | X80025            | 114                           | 51             | 0        | 41             | 0         | -1.47803       | 0.883        | -1.39311           | 0.77382        |
| FBgn0015168          | Dsim\ninja   | D83207            | 1246                          | 51             | 0        | 41             | 0         | -1.91035       | 0.448        | -1.5188            | 0.80386        |
| FBgn0015945          | GATE         | AJ010298          | 788                           | 51             | 0        | 41             | 0         | -1.28988       | 0.965        | -1.13806           | 0.87296        |
| FBgn0023131          | ZAM          | AJ000387          | 58                            | 51             | 0        | 41             | 0         | -2.17033       | 0.990        | -1.61192           | 0.6531         |
| FBgn0026065          | Idefix       | AJ009736          | 2                             | 51             | 0        | 41             | 0         | -2.47527       | 0.820        | -1.28902           | 0.85659        |
| FBgn0026416          | INE-1        | U66884            | 8                             | 51             | 0        | 41             | 0         | -2.5185        | 0.696        | -0.39372           | 0.64254        |
| FBgn0026443          | Dyak\TART    | AF468026          | 152                           | 51             | 0        | 41             | 0         | -0.86517       | 0.519        | -0.80413           | 0.63823        |
| FBgn0040267          | Transpac     | AF222049          | 204                           | 51             | 0        | 41             | 0         | -0.39943       | 0.056        | -1.01755           | 0.95726        |
| FBgn0041728          | Rt1a         | AJ278684          | 16                            | 51             | 0        | 41             | 0         | -0.42303       | 0.567        | -0.97235           | 0.75333        |
| FBgn0042231          | X-element    | AF237761          | 536                           | 51             | 0        | 41             | 0         | -0.88247       | 0.625        | -0.92549           | 0.97344        |
| FBgn0042682          | Rt1b         | AF281636          | 642                           | 51             | 0        | 41             | 0         | -0.36436       | 0.552        | -0.88279           | 0.98929        |
| FBgn0044997          | Dfun\Isfun-1 | AJ309320          | 1                             | 51             | 0        | 41             | 0         | -1.85151       | 0.930        | -1.23279           | 0.92776        |
| FBgn0046110          | Juan         | AY180919          | 1111                          | 51             | 0        | 41             | 0         | -1.57674       | 0.384        | -0.57506           | 0.99869        |
| FBgn0063432          | gypsy5       | AE003485          | 69                            | 51             | 0        | 41             | 0         | -2.76696       | 0.940        | -1.7717            | 0.95716        |
| FBgn0063434          | gypsy3       | AC007477          | 301                           | 51             | 0        | 41             | 0         | -1.35685       | 0.671        | -0.12006           | 0.97611        |
| FBgn0063435          | gypsy2       | AL035631          | 100                           | 51             | 0        | 41             | 0         | -1.34233       | 0.451        | -0.97145           | 0.8725         |
| <b>FBgn0063450</b>   | <b>Tom1</b>  | <b>Z24451</b>     | <b>118</b>                    | <b>51</b>      | <b>0</b> | <b>31</b>      | <b>10</b> | <b>-2.7071</b> | <b>0.733</b> | <b>-0.9084</b>     | <b>0.70185</b> |
| FBgn0063755          | Osvaldo      | AY089271          | 172                           | 51             | 0        | 41             | 0         | -0.21893       | 0.673        | -0.7358            | 0.85443        |
| FBgn0063782          | accord2      | AF541947          | 464                           | 51             | 0        | 41             | 0         | -1.6155        | 0.725        | -0.7682            | 0.91337        |

| FlyBase<br>Accession | TE Identity  | NCBI<br>Accession | No. of Reads<br>Mapping to TE | DI strain type |        | DS strain type |        | Dysgenic Cross |         | Non-Dysgenic Cross |         |
|----------------------|--------------|-------------------|-------------------------------|----------------|--------|----------------|--------|----------------|---------|--------------------|---------|
|                      |              |                   |                               | present        | absent | present        | absent | Z value        | p-value | Z value            | p-value |
| FBgn0000004          | 17.6         | X01472            | 2                             | 51             | 0      | 41             | 0      | -0.39149       | 0.730   | -1.18624           | 0.80632 |
| FBgn0000005          | 297          | X03431            | 130                           | 51             | 0      | 41             | 0      | -2.01491       | 0.893   | -1.42197           | 0.81195 |
| FBgn0000007          | 1731         | X07656            | 1430                          | 51             | 0      | 41             | 0      | -1.67161       | 0.921   | 0.24463            | 0.58643 |
| FBgn0000155          | roo          | AY180917          | 2046                          | 51             | 0      | 41             | 0      | -3.30206       | 0.267   | -1.66303           | 0.47847 |
| FBgn0000199          | blood        | AY180916          | 690                           | 51             | 0      | 41             | 0      | -0.99903       | 0.944   | -1.5414            | 0.70209 |
| FBgn0000349          | copia        | X02599            | 162                           | 51             | 0      | 41             | 0      | -1.87497       | 0.678   | -1.14494           | 0.56334 |
| FBgn0000481          | Doc          | X17551            | 668                           | 51             | 0      | 41             | 0      | -1.06952       | 0.451   | -0.33114           | 0.96105 |
| FBgn0000638          | FB           | V00246            | 62                            | 51             | 0      | 41             | 0      | -2.74924       | 0.379   | -0.9269            | 0.64241 |
| FBgn0000652          | F-element    | AC005198          | 66                            | 51             | 0      | 41             | 0      | -1.7608        | 0.844   | -1.18336           | 0.90021 |
| FBgn0001100          | G-element    | X06950            | 2                             | 51             | 0      | 41             | 0      | 0.46267        | 0.149   | -0.55518           | 0.75958 |
| FBgn0001167          | gypsy        | M12927            | 82                            | 51             | 0      | 41             | 0      | -3.00189       | 0.415   | -1.14864           | 0.70764 |
| FBgn0001181          | HB           | X01748            | 36                            | 51             | 0      | 41             | 0      | -2.37633       | 0.759   | -1.31492           | 0.85416 |
| FBgn0001207          | HMS-Beagle   | AF365402          | 222                           | 51             | 0      | 41             | 0      | -2.23781       | 0.801   | -0.66547           | 0.62644 |
| FBgn0001210          | hobo         | M69216            | 1070                          | 51             | 0      | 41             | 0      | -2.22755       | 0.820   | -0.75427           | 0.97104 |
| FBgn0001249          | I-element    | M14954            | 234                           | 51             | 0      | 41             | 0      | -2.48112       | 0.916   | -1.05276           | 0.94185 |
| FBgn0001283          | jockey       | M22874            | 56                            | 51             | 0      | 41             | 0      | -1.97423       | 0.692   | -0.72319           | 0.75113 |
| FBgn0002651          | Dmau\mariner | M14653            | 356                           | 51             | 0      | 41             | 0      | -2.32102       | 0.728   | -1.04207           | 0.9305  |
| FBgn0002697          | mdg1         | X59545            | 108                           | 51             | 0      | 41             | 0      | -0.5451        | 0.342   | 0.23008            | 0.61598 |
| FBgn0002698          | mdg3         | X95908            | 116                           | 51             | 0      | 41             | 0      | -2.46209       | 0.363   | -1.48184           | 0.71795 |
| FBgn0063897          | Stalker4     | AF541949          | 16                            | 51             | 0      | 41             | 0      | -2.32908       | 0.674   | -1.58999           | 0.68398 |
| FBgn0063917          | McClintock   | AF541948          | 76                            | 51             | 0      | 41             | 0      | -2.45278       | 0.833   | -1.02479           | 0.88787 |
| FBgn0063919          | Max-element  | AJ487856          | 8042                          | 51             | 0      | 41             | 0      | -1.18875       | 0.784   | -0.90187           | 0.90862 |
| FBgn0066148          | Dvir\TART    | AY219709          | 52                            | 51             | 0      | 41             | 0      | -1.36247       | 0.013   | 0.33571            | 0.00176 |
| FBgn0067380          | invader6     | NT_033778         | 788                           | 51             | 0      | 41             | 0      | -2.25478       | 0.564   | -1.81172           | 0.69662 |
| FBgn0067381          | hopper2      | AF541950          | 2                             | 51             | 0      | 41             | 0      | -2.77127       | 0.099   | -1.20656           | 0.18121 |
| FBgn0067382          | gypsy9       | AE002591          | 6                             | 51             | 0      | 41             | 0      | -1.24682       | 0.409   | -1.1465            | 0.56632 |
| FBgn0067383          | gypsy8       | AE003788          | 4                             | 51             | 0      | 41             | 0      | 0.18771        | 0.475   | -0.55607           | 0.99382 |
| FBgn0067384          | gypsy7       | AE003788          | 4                             | 51             | 0      | 41             | 0      | -0.70493       | 0.560   | -0.9531            | 0.86706 |
| FBgn0067385          | gypsy12      | AE003789          | 216                           | 51             | 0      | 41             | 0      | -0.4693        | 0.144   | -0.97919           | 0.65992 |
| FBgnnnnnnnn          | Dpse\mini-me | AC131959          | 1510                          | 51             | 0      | 41             | 0      | -1.30225       | 0.683   | -0.7871            | 0.81431 |

**Supplementary Table 3.** Primers used for identifying the presence or absence of  
Primers used for identifying the presence or absence of P-element

| Start position and direction | Sequence                      |
|------------------------------|-------------------------------|
| Exon0 – 94 forward           | GGTTGTGTGCGGACGAATTT          |
| Exon0 – 378 reverse          | CTGGTTCAGGCTCTATCACTTT        |
| Exon1 – 615 forward          | TCTACGCAAAATCTTCACGGAC        |
| Exon1 – 1144 reverse         | CTGATATACCGAGCTCTGTCCA        |
| Exon2 – 1241 forward         | TCCTGCAGATGACCATTAAAGA        |
| Exon2 – 1900 reverse         | TTAAACTGCAGTGGAGTGGGAT        |
| Exon3 – 2181 forward         | GGACAACTCTGAAAGCTGGC          |
| Exon3 – 2545 reverse         | CGTTTCGCGCTGCTAATATTAA        |
| TIR – 3-31 forward & reverse | TGATGAAATAACATAAGGTGGTCCCGTCG |
